# Supplementary material for: Adsorption of drugs on B12N12 and Al12N12 nanocages
Source: Royal Society of Chemistry journal article supplement (doi:10.1039/d4ra05586a), 2024-01-01
Supplement: d4ra05586a1.pdf [file d4ra05586a1.pdf]

Supporting Information

## Adsorption of Drugs on B<sub>12</sub>N<sub>12</sub> and Al<sub>12</sub>N<sub>12</sub> nanocages

Remya Geetha Sadasivan Nair\*, Arun Kumar Narayanan Nair\*, and Shuyu Sun\*

Physical Science and Engineering Division (PSE), Computational Transport Phenomena Laboratory, King Abdullah University of Science and Technology (KAUST), Thuwal, 23955-6900, Saudi Arabia.

\* To whom correspondence should be addressed,

email: remya.nair@kaust.edu.sa; arun.narayanannair@kaust.edu.sa; shuyu.sun@kaust.edu.sa

Table S1. Comparison of our computed  $E_{\text{ads}}$  values with the DFT results from the literature.  $E_{\text{ads}}$  values are given in kcal/mol.

| Drug/nanocage                                                    | $E_{\text{ads}}$<br>(literature) | $E_{\text{ads}}$<br>(our work) | % difference |
|------------------------------------------------------------------|----------------------------------|--------------------------------|--------------|
| sulfanilamide/ B <sub>12</sub> N <sub>12</sub> <sup>S1</sup>     | -27.53                           | -32.50                         | -15.3        |
| sulfanilamide/ Al <sub>12</sub> N <sub>12</sub> <sup>S2</sup>    | -47.17                           | -40.38                         | 16.8         |
| 6-thioguanine/ B <sub>12</sub> N <sub>12</sub> <sup>S2</sup>     | -33.64                           | -32.48                         | 3.6          |
| ciclopirox/ B <sub>12</sub> N <sub>12</sub> <sup>S3</sup>        | -29.44                           | -30.07                         | -2.1         |
| 4-amino pyridine/ B <sub>12</sub> N <sub>12</sub> <sup>S4</sup>  | -24.05                           | -31.13                         | -22.7        |
| 4-amino pyridine/ Al <sub>12</sub> N <sub>12</sub> <sup>S4</sup> | -30.29                           | -31.36                         | -3.4         |
| ciclopirox/ Al <sub>12</sub> N <sub>12</sub> <sup>S5</sup>       | -79.56                           | -92.65                         | -14.1        |
| metformin/ B <sub>12</sub> N <sub>12</sub> <sup>S6</sup>         | -31.36                           | -39.40                         | -20.4        |
| isoniazid/ B <sub>12</sub> N <sub>12</sub> <sup>S7</sup>         | -26.32                           | -35.29                         | -25.4        |
| 6-mercaptopurine/ B <sub>12</sub> N <sub>12</sub> <sup>S8</sup>  | -28.60                           | -31.35                         | -8.8         |

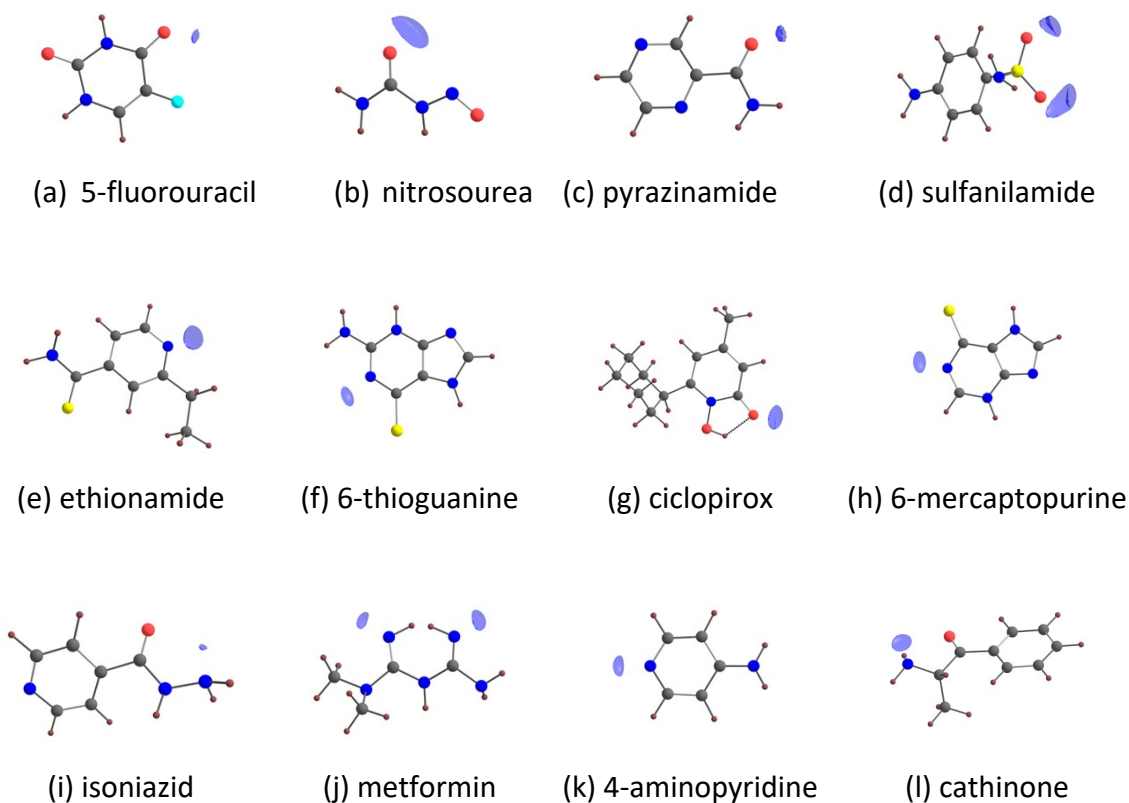

Figure S1. MESP  $V_{\min}$  features of (a) 5-fluorouracil, (b) nitrosoourea, (c) pyrazinamide, (d) sulfanilamide, (e) ethionamide, (f) 6-thioguanine, (g) ciclopirox, (h) 6-mercaptapurine, (i) isoniazid, (j) metformin, (k) 4-aminopyridine and (l) cathinone. Color code: gray-C, blue-N, yellow-S, maroon-H, cyan-F, red-O.

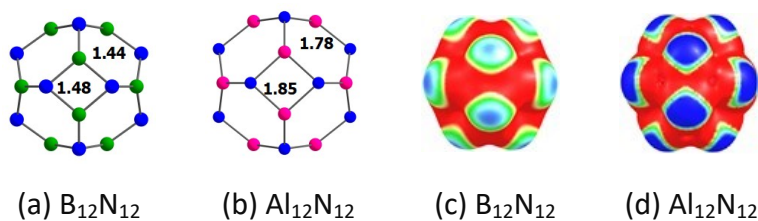

Figure S2. Optimized structures of (a)  $B_{12}N_{12}$  and (b)  $Al_{12}N_{12}$ .<sup>59</sup> The bond distances are given in Å. Color code: purple-Al, green-B, and blue-N. Also shown are the MESP mapped onto the 0.01 a.u. electron density isosurface of (c)  $B_{12}N_{12}$  and (d)  $Al_{12}N_{12}$ .<sup>59</sup> Color code: blue -0.04 a.u. to red 0.04 a.u. Blue represents the most electron-rich region and red the most electron-poor region.

Table S2. Change in structural parameters due to drug adsorption on  $B_{12}N_{12}$ . Bond length in Å and bond angles in degrees.

| drug             | bond angle of drug                   |       | bond length of drug                  |      | bond angle of cage                   |      |
|------------------|--------------------------------------|-------|--------------------------------------|------|--------------------------------------|------|
|                  | drug/B <sub>12</sub> N <sub>12</sub> | drug  | drug/B <sub>12</sub> N <sub>12</sub> | drug | drug/B <sub>12</sub> N <sub>12</sub> | cage |
| 5-fluorouracil   | 124.1                                | 123.4 | 1.26                                 | 1.20 | 115.9                                | 125  |
| nitrosoarea      | 124.8                                | 125.2 | 1.25                                 | 1.20 | 115.9                                | 125  |
| pyrazinamide     | 119.5                                | 116.2 | 1.33                                 | 1.33 | 117.2                                | 125  |
| sulfanilamide    | 119.1                                | 120.6 | 1.45                                 | 1.38 | 117.4                                | 125  |
| ethionamide      | 120.3                                | 118.3 | 1.34                                 | 1.33 | 115.8                                | 125  |
| 6-thioguanine    | 106.3                                | 103.2 | 1.36                                 | 1.35 | 117.1                                | 125  |
| ciclopirox       | 118.7                                | 116.7 | 1.30                                 | 1.23 | 115.3                                | 125  |
| 6-mercaptopurine | 106.3                                | 103.2 | 1.36                                 | 1.35 | 117.4                                | 125  |
| isoniazid        | 115.2                                | 119.4 | 1.41                                 | 1.39 | 117.3                                | 125  |
| metformin        | 121.3                                | 121.0 | 1.31                                 | 1.27 | 115.3                                | 125  |
| 4-aminopyridine  | 119.0                                | 115.9 | 1.34                                 | 1.33 | 115.8                                | 125  |
| cathinone        | 106.5                                | 108.5 | 1.48                                 | 1.45 | 116.9                                | 125  |

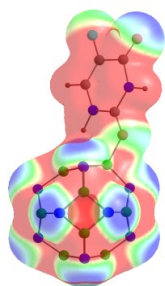

(a) 5-fluorouracil

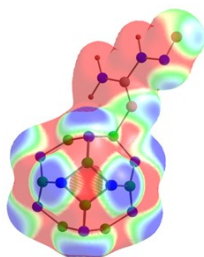

(b) nitrosoarea

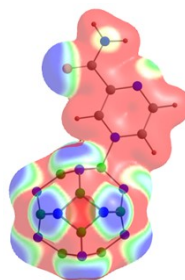

(c) pyrazinamide

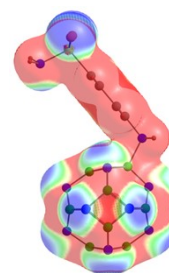

(d) sulfanilamide

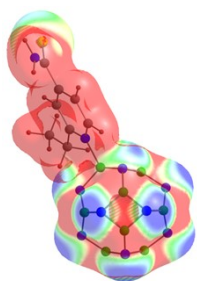

(e) ethionamide

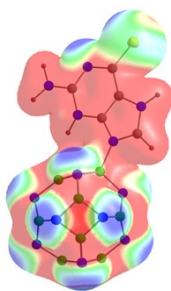

(f) 6-thioguanine

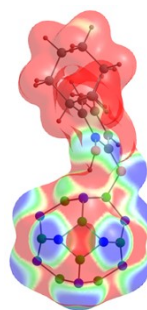

(g) ciclopirox

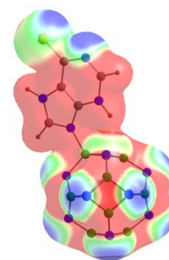

(h) 6-mercaptopurine

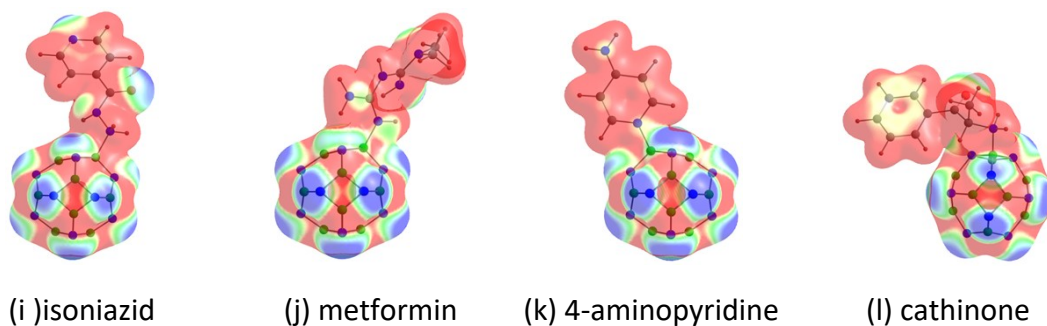

Figure S3. MESP mapped onto the 0.01 a.u. electron density isosurface of (a) 5-fluorouracil, (b) nitrosourea, (c) pyrazinamide, (d) sulfanilamide, (e) ethionamide, (f) 6-thioguanine, (g) ciclopirox, (h) 6-mercaptopurine, (i) isoniazid, (j) metformin, (k) 4-aminopyridine and (l) cathinone adsorbed on  $B_{12}N_{12}$ . Color code is same as in Figure S2.

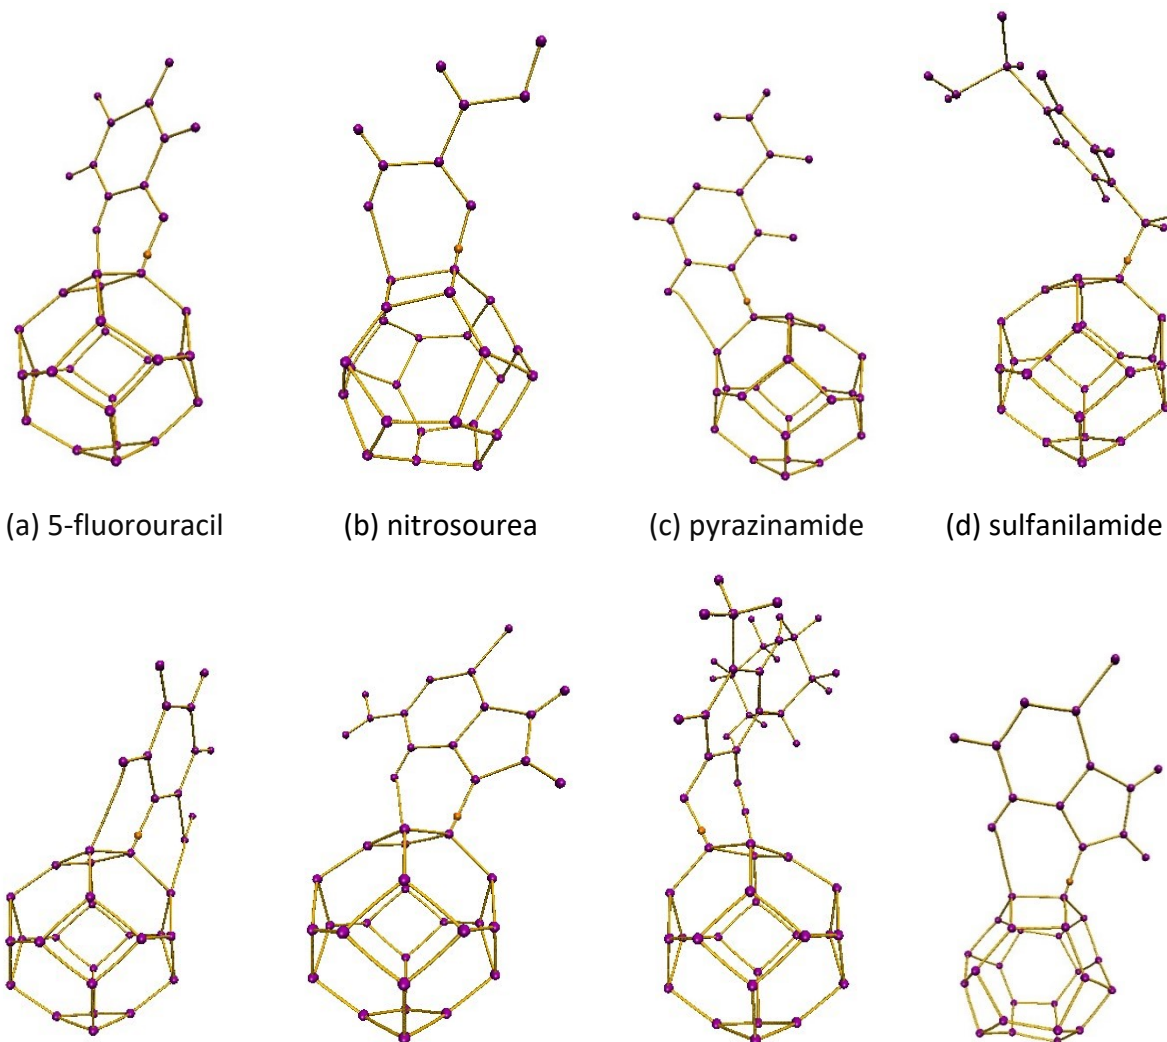

(e) 2-mercaptopyridine

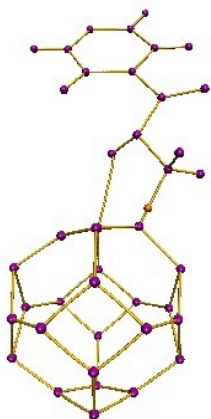

(f) 6-thioguanine

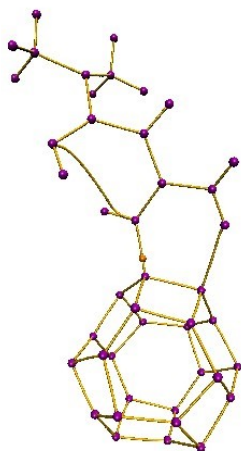

(g) ciclopirox

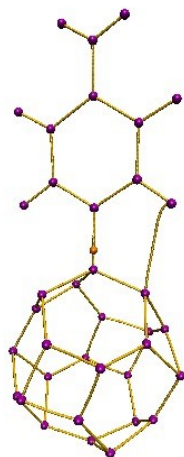

(h) 6-mercaptapurine

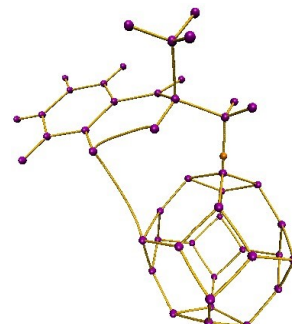

(i) isoniazid

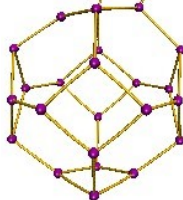

(j) metformin

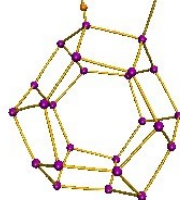

(k) 4-aminopyridine

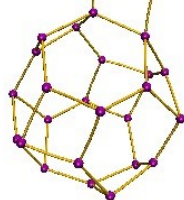

(l) cathinone



Figure S4. QTAIM plots for (a) 5-fluorouracil, (b) nitrosourea, (c) pyrazinamide, (d) sulfanilamide, (e) ethionamide, (f) 6-thioguanine, (g) ciclopirox, (h) 6-mercaptapurine, (i) isoniazid, (j) metformin, (k) 4-aminopyridine and (l) cathinone adsorbed on  $B_{12}N_{12}$ .

Table S3. Change in structural parameters due to drug adsorption on  $Al_{12}N_{12}$ . Bond length in Å and bond angles in degrees.

| drug             | bond angle of drug    |       | bond length of drug   |      | bond angle of cage    |      |
|------------------|-----------------------|-------|-----------------------|------|-----------------------|------|
|                  | drug/ $Al_{12}N_{12}$ | drug  | drug/ $Al_{12}N_{12}$ | drug | drug/ $Al_{12}N_{12}$ | cage |
| 5-fluorouracil   | 125.8                 | 123.4 | 1.28                  | 1.20 | 112.9                 | 125  |
| nitrosourea      | 122.9                 | 125.2 | 1.26                  | 1.19 | 113.9                 | 125  |
| pyrazinamide     | 117.7                 | 116.2 | 1.26                  | 1.21 | 118.1                 | 125  |
| sulfanilamide    | 104.6                 | 107.5 | 1.51                  | 1.45 | 118.0                 | 125  |
| ethionamide      | 120.4                 | 118.3 | 1.35                  | 1.33 | 119.6                 | 125  |
| 6-thioguanine    | 105.0                 | 106.9 | 1.34                  | 1.35 | 119.9                 | 125  |
| ciclopirox       | 120.2                 | 113.3 | 1.35                  | 1.37 | 117.9                 | 125  |
| 6-mercaptapurine | 116.1                 | 113.1 | 1.34                  | 1.32 | 115.7                 | 125  |
| isoniazid        | 115.8                 | 119.4 | 1.42                  | 1.39 | 121.0                 | 125  |
| metformin        | 120.9                 | 121.0 | 1.31                  | 1.27 | 117.5                 | 125  |
| 4-aminopyridine  | 118.6                 | 115.9 | 1.34                  | 1.33 | 118.4                 | 125  |
| cathinone        | 106.7                 | 108.5 | 1.49                  | 1.45 | 120.7                 | 125  |

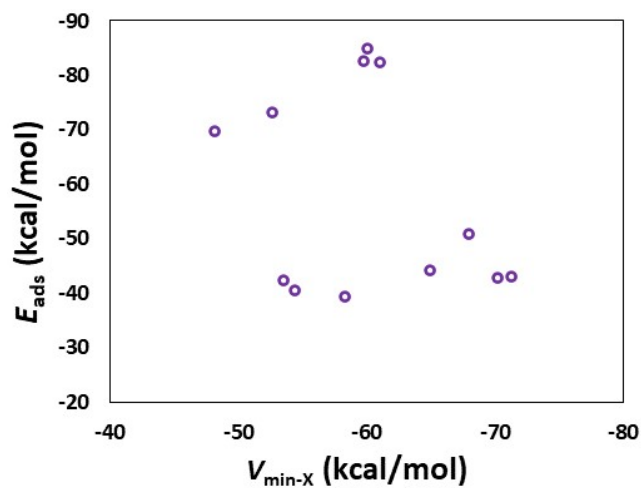

Figure S5. Correlation between  $V_{\min-X}$  and  $E_{\text{ads}}$  for drug-adsorbed  $\text{Al}_{12}\text{N}_{12}$  nanocage.

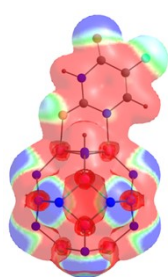

(a) 5-fluorouracil

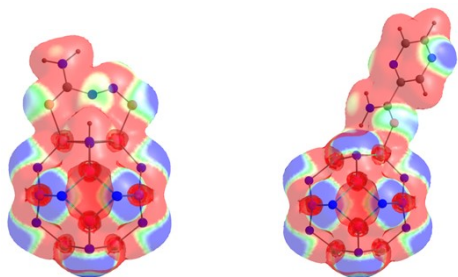

(b) nitrosourea

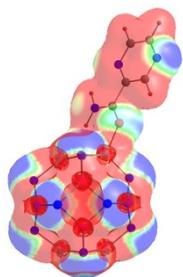

(c) pyrazinamide

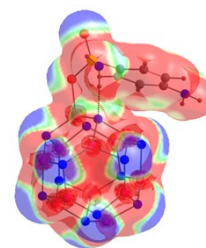

(d) sulfanilamide

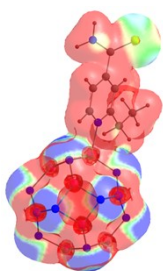

(e) ethionamide

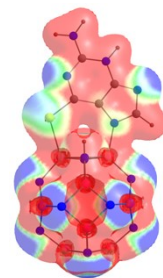

(f) thioguanine

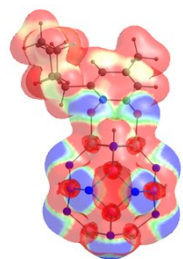

(g) ciclopirox

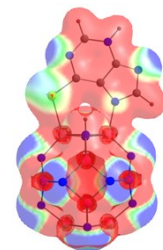

(h) 6-mercaptopurine

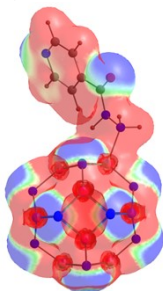

(i) isoniazid

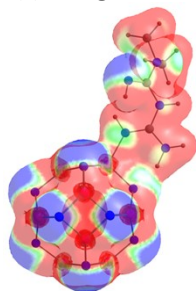

(j) metformin

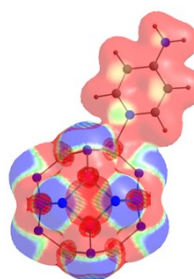

(k) 4-aminopyridine

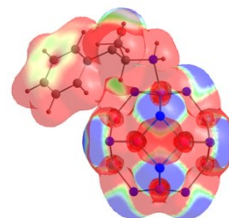

(l) cathinone

Figure S6. MESP mapped onto the 0.01 a.u. electron density isosurface of (a) 5-fluorouracil, (b) nitrosourea, (c) pyrazinamide, (d) sulfanilamide, (e) ethionamide, (f) 6-thioguanine, (g) ciclopirox, (h) 6-mercaptapurine, (i) isoniazid, (j) metformin, (k) 4-aminopyridine and (l) cathinone adsorbed on  $Al_{12}N_{12}$ . Color code is same as in Figure S2.

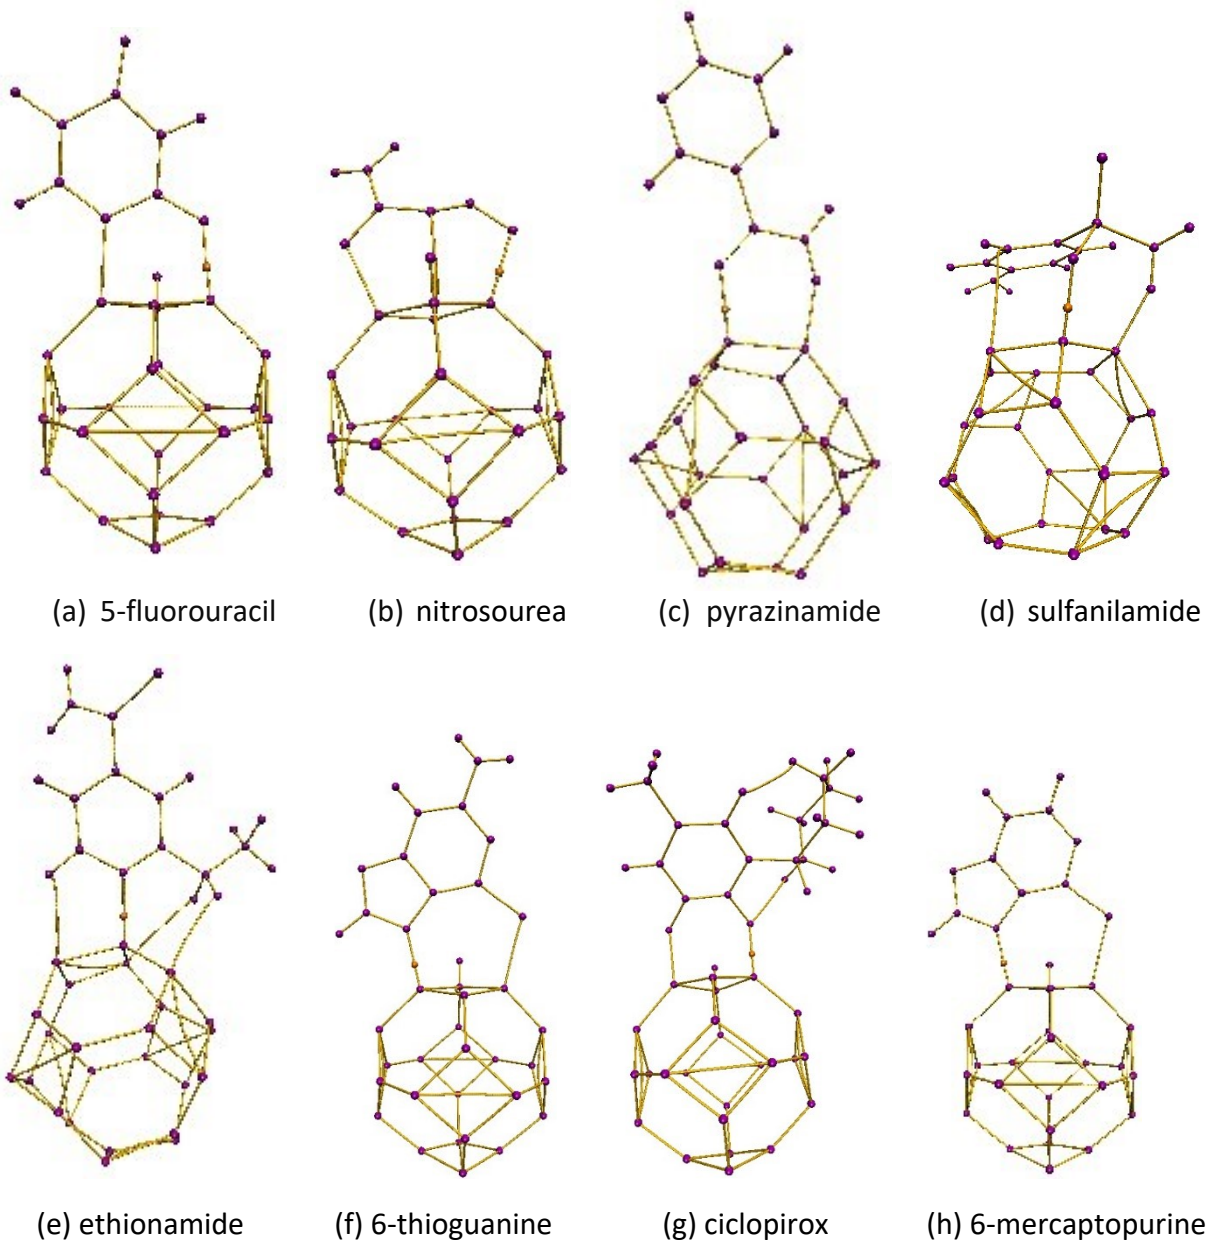

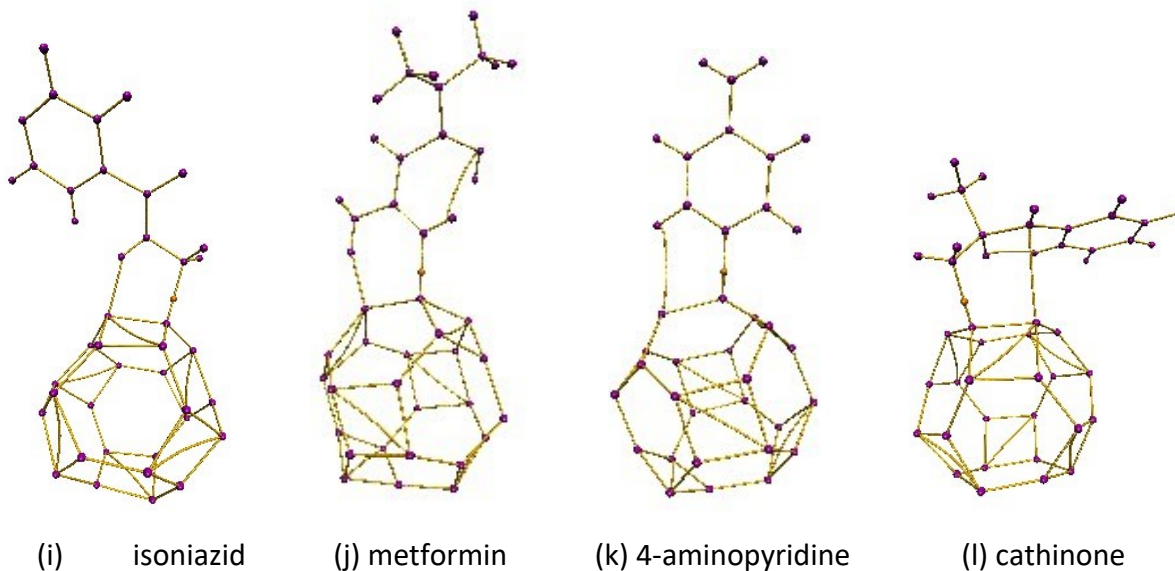

Figure S7. QTAIM plots of drugs (a) 5-fluorouracil, (b) nitrosourea, (c) pyrazinamide, (d) sulfanilamide, (e) ethionamide, (f) 6-thioguanine, (g) ciclopirox, (h) 6-mercaptopurine, (i) isoniazid, (j) metformin, (k) 4-aminopyridine and (l) cathinone adsorbed on  $Al_{12}N_{12}$ .

Table S4. Recovery time ( $\tau$ , in ns) of the drug adsorbed nanocages.

| Drug             | $\tau$               |                       |
|------------------|----------------------|-----------------------|
|                  | drug/ $B_{12}N_{12}$ | drug/ $Al_{12}N_{12}$ |
| 5-fluorouracil   | $1 \times 10^5$      | $5 \times 10^{38}$    |
| nitrosourea      | $8 \times 10^3$      | $2 \times 10^{41}$    |
| pyrazinamide     | $1 \times 10^8$      | $6 \times 10^{18}$    |
| sulfanilamide    | $3 \times 10^5$      | $3 \times 10^{17}$    |
| ethionamide      | $2 \times 10^{11}$   | $4 \times 10^{16}$    |
| 6-thioguanine    | $3 \times 10^{12}$   | $1 \times 10^{48}$    |
| ciclopirox       | $3 \times 10^9$      | $6 \times 10^{49}$    |
| 6-mercaptopurine | $7 \times 10^{10}$   | $9 \times 10^{47}$    |
| isoniazid        | $7 \times 10^{13}$   | $1 \times 10^{20}$    |
| metformin        | $3 \times 10^{17}$   | $9 \times 10^{24}$    |
| 4-aminopyridine  | $5 \times 10^{15}$   | $1 \times 10^{19}$    |
| cathinone        | $1 \times 10^{15}$   | $2 \times 10^{19}$    |



## References

- S1. F. Azarakhshi, S. Shahab, S. Kaviani and M. Sheikhi, *Lett. Org. Chem.*, 2021, **18**, 640-655.
- S2. M. Noormohammadbeigi, S. Kamalinahad, F. Izadi, M. Adimi and A. Ghasemkhani, *Mat. Res. Exp.*, 2019, **6**, 1250g1252.
- S3. S. Kaviani, S. Shahab, M. Sheikhi, V. Potkin and H. Zhou, *Comput. Theor. Chem.*, 2021, **1201**, 113246.
- S4. R. Padash, A. Sobhani-Nasab, M. Rahimi-Nasrabadi, M. Mirmotahari, H. Ehrlich, A. S. Rad and M. Peyravi, *App. Phys. A*, 2018, **124**, 582.
- S5. M. J. Saadh, T. E. Sánchez Herrera, A. Mohammed Dhiaa, O. Villacrés Cáceres, L. M. Flores Fiallos, B. S. Rojas Oviedo, A. A. Omran, M. N. Hawas and A. Elawady, *Mol. Phys.*, 2024, e2314132.
- S6. A. S. Ghasemi, M. R. Taghartapeh, A. Soltani and P. J. Mahon, *J. Mol. Liq.*, 2019, **275**, 955-967.
- S7. H. R. A. El-Mageed, F. M. Mustafa and M. K. Abdel-Latif, *J. Biomol. Struct. Dyn.*, 2022, **40**, 226-235.
- S8. S. A. Aslanzadeh, *Mol. Phys.*, 2019, **117**, 531-538.
- S9. R. Geetha Sadasivan Nair, A. K. Narayanan Nair and S. Sun, *Energy Fuels*, 2023, **37**, 14053-14063.
